# Supplementary material for: Fraud and misrepresentation in retail forest products exceeds U.S. forensic wood science capacity
Source: PLoS One. 2019 Jul 25;14(7):e0219917. doi: 10.1371/journal.pone.0219917 (PMC6657862; doi:10.1371/journal.pone.0219917)
Supplement: S3 File — (XLSX) [file pone.0219917.s003.xlsx]

## Sheet: List_of_SurveyRecipients 
Names & Emails of Recipients of WWF/WRI/USFS FPL Survey and Request for Participation in Ring/Blind Testing
Responded at least partially to Sept. 2016 initial survey		Email	Organization/Affiliation/Institution	Last name	First name	Website:	In IAWA Index of Xylariorum (See References)
	Federal government
Yes	Museum/Academia
Yes	Museum/Academia
	Museum/Academia
Yes	Museum/Academia
Yes	Consultant
	Museum/Academia						Yes
Yes	Consultant
	Museum/Academia						Yes
Yes	Museum/Academia
	Museum/Academia
Yes	Museum/Academia
	Museum/Academia
	Museum/Academia
Yes	Museum/Academia
Yes	Museum/Academia
	Museum/Academia
Yes	Museum/Academia
	Museum/Academia
	Museum/Academia
	Museum/Academia
	Museum/Academia
	Consultant
	Museum/Academia
Yes	Museum/Academia
	Museum/Academia
	Federal government
	Museum/Academia						Yes
Yes	Museum/Academia
Yes	Museum/Academia						Yes
	Museum/Academia						Yes
	Museum/Academia						Yes
	Museum/Academia						Yes
	Museum/Academia						Yes
	Museum/Academia
	Museum/Academia
	Museum/Academia
SURVEY CO-LEAD	Consultant
SURVEY CO-LEAD	NGO
	Museum/Academia
Yes	Museum/Academia						Yes
	Museum/Academia						Yes
SURVEY LEAD	Federal government						Yes
	Museum/Academia						Yes
	Federal government
	Federal government
leads and co-leads not included in metrics

## Sheet: Respondents_SurveyResults
End Date		Please provide the name of your organization:	Please provide your name and title (person filling out survey):	Please provide your email address (email of person filling out survey):	1. Does your laboratory have a regional, national, or international focus? (if so, please specify area of focus)	2. Does your laboratory have a xylarium?	2a. How many taxa are in the xylarium collection? (Please enter in the closest whole number, with no commas or other formatting)	2b. Specimens in wood collection (Please enter in the closest whole number, with no commas or other formatting)				2c. Vouchered Specimens (Please enter in the closest whole number with no commas, or other formatting)				3. Does your laboratory have a slide collection?	Slide Collection Details (Please enter in the closest whole number, with no commas, or other formatting)		4. Does your laboratory conduct wood and forest product identifications?	4a. What percent of your laboratory’s workload per year is spent doing wood and forest product identifications? (Please enter in the closest whole number with no commas, or other formatting)	4b. By percentage, who are the customers of your wood identification service? (Please enter in the closest whole number with no commas, or other formatting)					4c. What percentage of your identification workload is paid work and what percentage is free service work? (Please enter in the closest whole number with no commas, or other formatting)		4d. How many requests does your laboratory handle per year? (Please enter in the closest whole number with no commas, or other formatting)	4e. Specimen identification (Please enter in the closest whole number with no commas, or other formatting)		4f. What percent of the total person-hours across all staff in your lab are spent on identifications? (Please enter in the closest whole number with no commas, or other formatting)	4g. Of the total effort put into identifications each year, what percent is devoted to domestic, exotics? (Please enter in the closest whole number with no commas, or other formatting)		4h. What types of specimens are typically submitted to your lab? (e.g. solid wood, plywood, finished products, trace evidence, subsamples from artifacts, etc.)	4i. Non-identifiable specimens (Please enter in the closest whole number with no commas, or other formatting)			4j. Do you have the ability to accurately identify non-woody wood-like materials (e.g. palm and bamboo)? If so, please give some examples.	4k. Accreditation			4l. How many staff examine a given specimen before a final identification is reached? (Please enter in the closest whole number with no commas, or other formatting)	4a) Are you or your colleagues interested in pursuing the option of becoming a 'fee-for-service' lab for wood identification?	4b) If so, what specifically do you see as your current impediments (financial [how much money?], staffing, etc)?	5. Wood identification trained staff? (Please enter in the closest whole number with no commas, or other formatting)
		Open-Ended Response	Open-Ended Response	Open-Ended Response	Open-Ended Response	Yes/No	Open-Ended Response	How many specimens total?	How many are stem wood?	How many are branch wood?	How many are root wood?	What percentage of your total specimens are vouchered?	What percentage of domestic specimens are vouchered?	What percentage of exotic specimens are vouchered?	What is the origin of non-vouchered specimens, and what means were employed to confirm their identification?	Yes/No	3a. How many taxa are in the collection?	3b. How many specimens are in the collection?	Yes/No	Open-Ended Response	Company/NGO contract?	Academic?	Government?	Forensic/Legal?	General public/general interest?	Paid Work?	Free Service Work?	Open-Ended Response	How many specimens does your laboratory identify per year?	Of those specimens, what percent are domestic taxa?	Open-Ended Response	US Domestic woods?	Exotic woods?	Open-Ended Response	How many specimens per year are not identifiable by your laboratory?	How are those specimens handled?	To whom are those customers referred?	Open-Ended Response	Is your laboratory or staff accredited?	If so, by which organization/ISO?	If so, are individual staff certified or accredited?	Open-Ended Response	Open-Ended Response	Open-Ended Response	5a) How many staff do you have trained for wood identification?	5b) How many permanent staff?	5c) How many temporary staff?	5d) Within the temporary category, what is the approximate turnover rate?	5e) If you could host a training or become a training hub, to what level are you able to train someone (field screening level vs. forensic level)?
06/10/2017 03:11 PM	Consultant	REDACTED	REDACTED	REDACTED	Regional (Pacific NW) primarily, National secondary	Yes	135	162	154	8	0	96	99	91	Australian and New Zealand wood species obtained from a friend who sent the specimens with common names. No confirmation has been attempted so far.	Yes	35	75	Yes	10	30	20	30	10	10	60	40	60	50	90	10	90	10	solid wood, plywood, veneer,	6	In case of samples from marquetry veneers - no further attempt. Other samples referred.	FPL	No	No			1			1	1	0		Microscopic wood identification for domestic wood species
06/06/2017 11:51 AM	Museum/Academia	REDACTED	REDACTED	REDACTED	International	Yes	1000	1000	1000	0	0	0	0	0	Mostly from commercial sources	Yes	50	150	Yes	1	0	100	0	0	0	0	100	10	10	25	1	5	95	solid	1	Photos sent to specialists	USFPRL, Elizabeth Wheeler, Raquel Carreras	no	no			1			1	1	0		field screening
06/05/2017 02:35 PM	Museum/Academia	REDACTED	REDACTED	REDACTED	international (circum-Caribbean)	Yes
06/03/2017 10:58 AM	Consultant	REDACTED	REDACTED	REDACTED	national and international	No										No			Yes	90%	50	10	10	5	25	100	0	30	100	50%	100	50	50	all types	0			no	no			1			1	1	0		all levels
06/02/2017 10:53 AM	Museum/Academia	REDACTED	REDACTED	REDACTED	international - pigment producing wood-decay fungi	Yes
06/02/2017 09:48 AM	Museum/Academia	REDACTED	REDACTED	REDACTED	international	Yes	8000	32000	31500			50	90	40	many from other collections, SJR, Harvard, many of those from forestry institutes	Yes	3500	4500	Yes
06/02/2017 07:37 AM	Museum/Academia	REDACTED	REDACTED	REDACTED	Regional-National	Yes	100	500				n/d	n/d	n/d	n/d	Yes	50	200	No																								Not at the moment		2	2			screening
06/02/2017 07:27 AM	Consultant	REDACTED	REDACTED	REDACTED	All. I evaluate and test all types of wood and wood-base materials.	Yes	46	46	46				100			No			Yes	10-15	34			33	33	100		50+	50+		50	100	0	All of the above	10	Forwarded to another laboratory	SUNY ESF	Bamboo	No			1			1				Domestic species
06/02/2017 02:59 AM	Consultant	REDACTED	REDACTED	REDACTED	North America	Yes	50	75	55	20	0	0	0	0	cross comparison of multiple wood sample kits with Bruce Hoadley's "Identifying Wood".				Yes	50	34		33		33	100	0	10	30	95	20	75	25	solid wood	1	I provide "most likely" list, and do not charge a fee if I cannot identify a wood with surety.	I used to refer them to the Forest Products Laboratory in Madison	I have never been asked to identify non-woody, wood-like materials.	No			1			1	1	0		forensic for some species
12/19/2016 11:12 AM	Consultant	REDACTED	REDACTED	REDACTED	International	Yes	800	800	800	0	0	0	0	0	FPL & customer submission id'd by myself	No			Yes	100		0	0	90	10	100	0	150	270	90	100	80	20	solid wood	0			no	no			1			1	1
10/13/2016 07:48 AM	Museum/Academia	REDACTED	REDACTED	REDACTED	national	No										Yes	80	1000	Yes	10	0	10	20	20	50	0	100	50	200	90	100	90	10	solid wood	0	n/a	n/a	no	no			1 to 2			2	2	0	n/a
10/12/2016 09:55 AM	Museum/Academia	REDACTED	REDACTED	REDACTED	Not at this time	Yes	0	0	0	0	0	0	0	0	0	Yes	0	0	Yes
10/12/2016 09:49 AM	Museum/Academia	REDACTED	REDACTED	REDACTED	collection has specimens from all over the world	Yes	288	34784				100	100	100		Yes	288	24000	No																										0	0	0	0
10/07/2016 12:13 PM	Museum/Academia	REDACTED	REDACTED	REDACTED	International focus on wood quality and wood mechanics	Yes	300	3000	3000	0	0	0	0	0	?	Yes	60	600	Yes	1	50				50	25	75	5	10	95	20	95	5	solid	varies	?	Alex Wiedenhoeft	No	No			1			0	0	0	NA
10/05/2016 02:36 PM	Museum/Academia	REDACTED	REDACTED	REDACTED	Not really - national I guess	No										No			Yes	2			20	20	60	0	100	20	50	80	2	80	20	solid wood, finished products, artifacts	5	referred to FPL	referred to FPL	No	No			1			1	1	0
10/05/2016 01:23 PM	Museum/Academia	REDACTED	REDACTED	REDACTED	international	Yes
10/05/2016 10:16 AM	Museum/Academia	REDACTED	REDACTED	REDACTED	New York State	Yes
10/05/2016 09:21 AM	Museum/Academia	REDACTED	REDACTED	REDACTED	mostly national, some international	No										No			Yes	20	10		10	70	10	90	10	15	20	90%	20	90	10	all of above, plus archeological remains	1 or 2	returned to sender	Forest Products Laboratory	no	no			1			1	1	0	NA
10/05/2016 08:30 AM	Museum/Academia	REDACTED	REDACTED	REDACTED	international	Yes	100	1000	1000	1	1	0	0	0	0	Yes	25	100	Yes
10/05/2016 08:18 AM	Museum/Academia	REDACTED	REDACTED	REDACTED	International	Yes
10/05/2016 08:05 AM	Consultant	REDACTED	REDACTED	REDACTED	national	No										No			Yes	1	50	0	0	25	25	90	10	5	25	25	1	100	0	solid wood	0			no	no			1			1	1	0
10/04/2016 05:58 PM	Museum/Academia	REDACTED	REDACTED	REDACTED	Regional. Comprehensive land grant mission. Specialty in forest products											No			Yes	2%	25	25	0	10	40	5	95	25	15	90	1	90	10	Solid wood, composites, tree cores, charcoal, finished products	2	Forwarded on to others	Usda fpl	Minimally, bamboo, rattan	Yes	Swst	No	1			5	5	0	0
10/04/2016 05:31 PM	Museum/Academia	REDACTED	REDACTED	REDACTED	International											No			No
[truncated: 48 more columns]
