# Supplementary material for: Fraud and misrepresentation in retail forest products exceeds U.S. forensic wood science capacity
Source: PLoS One. 2019 Jul 25;14(7):e0219917. doi: 10.1371/journal.pone.0219917 (PMC6657862; doi:10.1371/journal.pone.0219917)
Supplement: S4 File — (XLSX) [file pone.0219917.s004.xlsx]

## Sheet: Academic 1
						Y/N/I						correct			attempted
checksum					Identifcation	Genus correct?	US	Exotic	Temp	Trop	US	Exotic	Temp	Trop	US	Exotic	Temp	Trop
Yes	6	6	46189	Quercus rubra	Quercus spp.	y	y		y		1	0	1	0	8	2	8	2
Yes	17	17	25484	Ostrya virginiana			y		y		0	0	0	0
Yes	37	37	22308	Jacaranda copala				y		y	0	0	0	0
Yes	53	53	40876	Pinus sylvestris L.				y	y		0	0	0	0
Yes	68	68	22303	Buchenavia grandis Ducke				y		y	0	0	0	0
Yes	87	87	34509	Eschewellera sessilis				y		y	0	0	0	0
Yes	104	104	31059	Maclura pomifera			y		y		0	0	0	0
Yes	119	119	23548	Celtis occidentalis	Ulmaceae	i	y		y		0	0	0	0
Yes	141	141	2854	Acer saccharum	Fagus spp.	n	y		y		0	0	0	0
Yes	155	155	40886	Betula alleghaniensis			y		y		0	0	0	0
Yes	178	178	37919	Ormosia paraensis				y		y	0	0	0	0
Yes	187	187	17663	Euplassa duquel				y		y	0	0	0	0
Yes	202	202	42740	Metasequoia glyptostroboides H.H.Hu & Cheng				y	y		0	0	0	0
Yes	214	214	46188	Morus alba			y		y		0	0	0	0
Yes	234	234	46252	Prunus sargentii Rehd.				y	y		0	0	0	0
Yes	247	247	24477	Dillenia pentagyna				y		y	0	0	0	0
Yes	266	266	48082	Picea pungens			y		y		0	0	0	0
Yes	271	271	37895	Dialium guianense				y		y	0	0	0	0
Yes	295	295	40894	Fraxinus pennsylvanica			y		y		0	0	0	0
Yes	302	302	37900	Virola sebifera				y		y	0	0	0	0
Yes	323	323	44016	Pinus contorta			y		y		0	0	0	0
Yes	330	330	23552	Malus sp.			y		y		0	0	0	0
Yes	356	356	37930	Enterolobium schomburgii				y		y	0	0	0	0
Yes	369	369	44251	Robinia pseudoacacia			y		y		0	0	0	0
Yes	378	378	48081	Picea glauca			y		y		0	0	0	0
Yes	400	400	27612	Ochroma pyramidale	Ochroma spp.	y		y		y	0	1	0	1
Yes	417	417	37903	Vochysia ferruginea				y		y	0	0	0	0
Yes	426	426	42741	Liriodendron tulipifera L.	Populus spp.	n	y		y		0	0	0	0
Yes	444	444	25406	Cedrelinga catenaeformis				y		y	0	0	0	0
Yes	468	468	40877	Pinus resinosa Ait.			y		y		0	0	0	0
Yes	477	477	40893	Robinia pseudoacacia			y		y		0	0	0	0
Yes	493	493	13400	Rhus typhina			y		y		0	0	0	0
Yes	509	509	3235	Pinus banksiana			y		y		0	0	0	0
Yes	522	522	17654	Hyeronima duquei	Juglans spp.	n		y		y	0	0	0	0
Yes	534	534	15007	Cupressus arizonica			y		y		0	0	0	0
Yes	549	549	42742	Tilia americanaL.	Populus spp.	n	y		y		0	0	0	0
Yes	571	571	10349	Chlorophora tinctoria				y		y	0	0	0	0
Yes	579	579	11224	Metopium brownel				y		y	0	0	0	0
Yes	602	602	14377	Ulmus crassifolia	Ulmaceae	i	y		y		0	0	0	0
Yes	609	609	15763	Pinus lambertiana			y		y		0	0	0	0
Yes	622	622	;	Cladratis lutea			y		y		0	0	0	0
Yes	636	636	10361	Terminalia amazonia				y		y	0	0	0	0
Yes	655	655	44246	Allanthus altissima			y		y		0	0	0	0
Yes	680	680	17662	Cedrela montana				y		y	0	0	0	0
Yes	695	695	26023	Podocarpus oleifolius				y		y	0	0	0	0
Yes	707	707	6354	Ulmus rubra	Ulmaceae	i	y		y		0	0	0	0
Yes	711	711	5838	Alnus jorullensis				y		y	0	0	0	0
Yes	745	745	21936	Vochysia duquei Pilger				y		y	0	0	0	0
Yes	748	748	15008	Juniperus deppeana			y		y		0	0	0	0
Yes	761	761	16554	Cordia alliodora				y		y	0	0	0	0
Yes	777	777	527	Thuja pilleata				y	y		0	0	0	0
Yes	796	796	25404	Calophyllum brasiliense				y		y	0	0	0	0
Yes	817	817	23550	Quercus macrocarpa Michx.	Quercus spp.	y	y		y		1	0	1	0
Yes	833	833	17636	Alnus jorullensis				y		y	0	0	0	0
Yes	838	838	1100	Catalpa speciosa			y		y		0	0	0	0
					number correct	3					2	1	2	1
					number wrong	4
				response rate	number inconclusive	3
				10	number blank	44
				0.181818	% correct	0.0545455
				some ID rate	% wrong	0.0727273
				0	% inconclusive	0.0545455
				1	% blank	0.8
					% correct of those attempted	0.272727

## Sheet: Academic 2
					Y/N/I
			From REDACTED	From REDACTED	Genus correct?						correct			attempted
			#	ID		US	Exotic	Temp	Trop	US	Exotic	Temp	Trop	US	Exotic	Temp	Trop
1	46189	Quercus rubra	1	red oak	y	y		y		1	0	1	0	23	7	27	3
26	25484	Ostrya virginiana	26	Don't know		y		y		0	0	0	0
33	22308	Jacaranda copala	33	Don't know			y		y	0	0	0	0
56	40876	Pinus sylvestris L.	56	pine	y		y	y		0	1	1	0
70	22303	Buchenavia grandis Ducke	70	Don't know			y		y	0	0	0	0
85	34509	Eschewellera sessilis	85	Don't know			y		y	0	0	0	0
106	31059	Maclura pomifera	106	Osage orange	y	y		y		1	0	1	0
124	23548	Celtis occidentalis	124	Hackberry	y	y		y		1	0	1	0
144	2854	Acer saccharum	144	soft maple	y	y		y		1	0	1	0
149	40886	Betula alleghaniensis	149	birch	y	y		y		1	0	1	0
169	37919	Ormosia paraensis	169	Don't know			y		y	0	0	0	0
181	17663	Euplassa duquel	181	Don't know			y		y	0	0	0	0
198	42740	Metasequoia glyptostroboides H.H.Hu & Cheng	198	hemlock	n		y	y		0	0	0	0
219	46188	Morus alba	219	Mulberry	y	y		y		1	0	1	0
237	46252	Prunus sargentii Rehd.	237	Soft maple	n		y	y		0	0	0	0
244	24477	Dillenia pentagyna	244	Don't know			y		y	0	0	0	0
261	48082	Picea pungens	261	spruce	y	y		y		1	0	1	0
276	37895	Dialium guianense	276	Don't know			y		y	0	0	0	0
288	40894	Fraxinus pennsylvanica	288	white ash	y	y		y		1	0	1	0
309	37900	Virola sebifera	309	Don't know			y		y	0	0	0	0
318	44016	Pinus contorta	318	Pine	y	y		y		1	0	1	0
342	23552	Malus sp.	342	Not sure		y		y		0	0	0	0
358	37930	Enterolobium schomburgii	358	Don't know			y		y	0	0	0	0
364	44251	Robinia pseudoacacia	364	Black locust	y	y		y		1	0	1	0
381	48081	Picea glauca	381	spruce	y	y		y		1	0	1	0
407	27612	Ochroma pyramidale	407	balsa wood	y		y		y	0	1	0	1
418	37903	Vochysia ferruginea	418	Don't know			y		y	0	0	0	0
433	42741	Liriodendron tulipifera L.	433	Yellow poplar	y	y		y		1	0	1	0
441	25406	Cedrelinga catenaeformis	441	Don't know			y		y	0	0	0	0
463	40877	Pinus resinosa Ait.	463	soft pine	y	y		y		1	0	1	0
475	40893	Robinia pseudoacacia	475	black locust	y	y		y		1	0	1	0
494	13400	Rhus typhina	494	Not sure		y		y		0	0	0	0
512	3235	Pinus banksiana	512	pine	y	y		y		1	0	1	0
526	17654	Hyeronima duquei	526	Don't know			y		y	0	0	0	0
532	15007	Cupressus arizonica	532	cedar	i	y		y		0	0	0	0
553	42742	Tilia americanaL.	553	basswood	y	y		y		1	0	1	0
573	10349	Chlorophora tinctoria	573	Don't know			y		y	0	0	0	0
578	11224	Metopium brownel	578	Don't know			y		y	0	0	0	0
596	14377	Ulmus crassifolia	596	Elm	y	y		y		1	0	1	0
620	15763	Pinus lambertiana	620	pine	y	y		y		1	0	1	0
621	;	Cladratis lutea	621	Don't know		y		y		0	0	0	0
638	10361	Terminalia amazonia	638	Don't know			y		y	0	0	0	0
660	44246	Allanthus altissima	660	Don't know		y		y		0	0	0	0
677	17662	Cedrela montana	677	Don't know			y		y	0	0	0	0
682	26023	Podocarpus oleifolius	682	Cedar	n		y		y	0	0	0	0
698	6354	Ulmus rubra	698	Elm	y	y		y		1	0	1	0
727	5838	Alnus jorullensis	727	Alder	y		y		y	0	1	0	1
742	21936	Vochysia duquei Pilger	742	Don't know			y		y	0	0	0	0
749	15008	Juniperus deppeana	749	Cedar	y	y		y		1	0	1	0
773	16554	Cordia alliodora	773	Don't know			y		y	0	0	0	0
782	527	Thuja pilleata	782	w redcedar	y		y	y		0	1	1	0
792	25404	Calophyllum brasiliense	792	Don't know			y		y	0	0	0	0
814	23550	Quercus macrocarpa Michx.	814	w oak	y	y		y		1	0	1	0
827	17636	Alnus jorullensis	827	Don't know			y		y	0	0	0	0
835	1100	Catalpa speciosa	835	chestnut	n	y		y		0	0	0	0
				number correct	25					21	4	23	2
				number wrong	4
			response rate	number inconclusive	1
			55	number blank	25
			1	% correct	0.454545
			some ID rate	% wrong	0.0727273
			23	% inconclusive	0.0181818
			0.581818	% blank	0.454545
				% correct of those attempted	0.833333

## Sheet: Consultant 1
					Y/N/I
				from REDACTED	Genus correct?						correct			attempted
				Identifcation		US	Exotic	Temp	Trop	US	Exotic	Temp	Trop	US	Exotic	Temp	Trop
1	46189	Quercus rubra	8	Quercus spp.(Red oak group)	y	y		y		1	0	1	0	20	6	22	4
26	25484	Ostrya virginiana	16	Ostrya virginiana (Eastern hophorn beam)	y	y		y		1	0	1	0
33	22308	Jacaranda copala	45	Simarouba amara (Marupa)	n		y		y	0	0	0	0
56	40876	Pinus sylvestris L.	60	Pinus resinosa (Red pine	y		y	y		0	1	1	0
70	22303	Buchenavia grandis Ducke	72	Terminalia superba (Limba)	n		y		y	0	0	0	0
85	34509	Eschewellera sessilis	91				y		y	0	0	0	0
106	31059	Maclura pomifera	96	Maclura pomifera (Osage orange)	y	y		y		1	0	1	0
124	23548	Celtis occidentalis	123	Celtis occidentalis (Hackberry), C. laevigata (Sugarberry)	y	y		y		1	0	1	0
144	2854	Acer saccharum	133	Acer rubrum (Red maple)	y	y		y		1	0	1	0
149	40886	Betula alleghaniensis	160	Betula spp. (Birch)	y	y		y		1	0	1	0
169	37919	Ormosia paraensis	176				y		y	0	0	0	0
181	17663	Euplassa duquel	189	Panopsis spp., Cardwellia sublimis, Grevillea robusta			y		y	0	0	0	0
198	42740	Metasequoia glyptostroboides H.H.Hu & Cheng	204				y	y		0	0	0	0
219	46188	Morus alba	211	Morus rubra (red mulberry)	y	y		y		1	0	1	0
237	46252	Prunus sargentii Rehd.	230	Prunus serotina (Black cherry)	y		y	y		0	1	1	0
244	24477	Dillenia pentagyna	239				y		y	0	0	0	0
261	48082	Picea pungens	267	Picea spp. (Spruce)	y	y		y		1	0	1	0
276	37895	Dialium guianense	270				y		y	0	0	0	0
288	40894	Fraxinus pennsylvanica	292	Fraxinus spp. (Ash)	y	y		y		1	0	1	0
309	37900	Virola sebifera	301				y		y	0	0	0	0
318	44016	Pinus contorta	326			y		y		0	0	0	0
342	23552	Malus sp.	331			y		y		0	0	0	0
358	37930	Enterolobium schomburgii	344	Afzelia spp.	n		y		y	0	0	0	0
364	44251	Robinia pseudoacacia	367	Robinia pseudoacacia (Black locust)	y	y		y		1	0	1	0
381	48081	Picea glauca	385			y		y		0	0	0	0
407	27612	Ochroma pyramidale	401	Ochroma pyramidale (Balsa)	y		y		y	0	1	0	1
418	37903	Vochysia ferruginea	410				y		y	0	0	0	0
433	42741	Liriodendron tulipifera L.	432	Liriodendron tulipifera (Yellow poplar)	y	y		y		1	0	1	0
441	25406	Cedrelinga catenaeformis	447				y		y	0	0	0	0
463	40877	Pinus resinosa Ait.	461	Pinus strobus (Eastern white pine)	y	y		y		1	0	1	0
475	40893	Robinia pseudoacacia	471	Robinia pseudoacacia (Black locust)	y	y		y		1	0	1	0
494	13400	Rhus typhina	492			y		y		0	0	0	0
512	3235	Pinus banksiana	502			y		y		0	0	0	0
526	17654	Hyeronima duquei	515				y		y	0	0	0	0
532	15007	Cupressus arizonica	545			y		y		0	0	0	0
553	42742	Tilia americanaL.	559	Tilia spp. (American basswood, White basswood or Lime)	y	y		y		1	0	1	0
573	10349	Chlorophora tinctoria	564				y		y	0	0	0	0
578	11224	Metopium brownel	576				y		y	0	0	0	0
596	14377	Ulmus crassifolia	598	Ulmus thomasi, U. alata, U. Crassifolia (Hard elm)	y	y		y		1	0	1	0
620	15763	Pinus lambertiana	619	Pinus lambertiana (Sugar pine)	y	y		y		1	0	1	0
621	;	Cladratis lutea	627	Cladrastis lutea (Yellowwood)	y	y		y		1	0	1	0
638	10361	Terminalia amazonia	649				y		y	0	0	0	0
660	44246	Allanthus altissima	664	Celtis occidentalis (Hackberry), C. laevigata (Sugarberry)	n	y		y		0	0	0	0
677	17662	Cedrela montana	674				y		y	0	0	0	0
682	26023	Podocarpus oleifolius	685				y		y	0	0	0	0
698	6354	Ulmus rubra	702			y		y		0	0	0	0
727	5838	Alnus jorullensis	723				y		y	0	0	0	0
742	21936	Vochysia duquei Pilger	739				y		y	0	0	0	0
749	15008	Juniperus deppeana	751			y		y		0	0	0	0
773	16554	Cordia alliodora	758				y		y	0	0	0	0
782	527	Thuja pilleata	781				y	y		0	0	0	0
792	25404	Calophyllum brasiliense	803				y		y	0	0	0	0
814	23550	Quercus macrocarpa Michx.	812	Quercus spp. (White oak group)	y	y		y		1	0	1	0
827	17636	Alnus jorullensis	821				y		y	0	0	0	0
835	1100	Catalpa speciosa	836	Catalpa spp.	y	y		y		1	0	1	0
				number correct	22					19	3	21	1
				number wrong	4
			response rate	number inconclusive	0
			27	number blank	29
			0.490909	% correct	0.4
			some ID rate	% wrong	0.0727273
			0	% inconclusive	0
			1	% blank	0.527273
				% correct of those attempted	0.846154

## Sheet: Consultant 2
					Y/N/I
				from REDACTED	Genus correct?						correct			attempted
				Identifcation		US	Exotic	Temp	Trop	US	Exotic	Temp	Trop	US	Exotic	Temp	Trop
1	46189	Quercus rubra	11	species in the red oak group (Quercus)	y	y		y		1	0	1	0	28	27	32	23
26	25484	Ostrya virginiana	22	hop-hornbeam (Ostrya)	y	y		y		1	0	1	0
33	22308	Jacaranda copala	42	species of Jacaranda	y		y		y	0	1	0	1
56	40876	Pinus sylvestris L.	58	species in the red pine group (Pinus)	y		y	y		0	1	1	0
70	22303	Buchenavia grandis Ducke	73	species of Terminalia	i		y		y	0	0	0	0
85	34509	Eschewellera sessilis	78	species in the family Sapotaceae	n		y		y	0	0	0	0
106	31059	Maclura pomifera	94	black locust (Robinia)	n	y		y		0	0	0	0
124	23548	Celtis occidentalis	127	hackberry (Celtis)	y	y		y		1	0	1	0
144	2854	Acer saccharum	142	maple (Acer)	y	y		y		1	0	1	0
149	40886	Betula alleghaniensis	163	birch (Betula)	y	y		y		1	0	1	0
169	37919	Ormosia paraensis	172	species of Ormosia	y		y		y	0	1	0	1
181	17663	Euplassa duquel	192	species in the family Proteaceae	i		y		y	0	0	0	0
198	42740	Metasequoia glyptostroboides H.H.Hu & Cheng	203	redwood (Sequoia)	n		y	y		0	0	0	0
219	46188	Morus alba	209	mulberry (Morus)	y	y		y		1	0	1	0
237	46252	Prunus sargentii Rehd.	229	cherry (Prunus)	y		y	y		0	1	1	0
244	24477	Dillenia pentagyna	250	species of Dillenia	y		y		y	0	1	0	1
261	48082	Picea pungens	257	spruce (Picea)	y	y		y		1	0	1	0
276	37895	Dialium guianense	280	species of Dialium	y		y		y	0	1	0	1
288	40894	Fraxinus pennsylvanica	298	ash (Fraxinus)	y	y		y		1	0	1	0
309	37900	Virola sebifera	303	species of Virola/Dialyanthera	y		y		y	0	1	0	1
318	44016	Pinus contorta	322	species in the yellow pine group (Pinus)	y	y		y		1	0	1	0
342	23552	Malus sp.	334	species of Aspidosperma	n	y		y		0	0	0	0
358	37930	Enterolobium schomburgii	347	species of Albizia	n		y		y	0	0	0	0
364	44251	Robinia pseudoacacia	370	black locust (Robinia)	y	y		y		1	0	1	0
381	48081	Picea glauca	384	larch (Larix)	n	y		y		0	0	0	0
407	27612	Ochroma pyramidale	397	balsa (Ochroma)	y		y		y	0	1	0	1
418	37903	Vochysia ferruginea	412	species of Qualea	n		y		y	0	0	0	0
433	42741	Liriodendron tulipifera L.	431	yellow-poplar (Liriodendron)	y	y		y		1	0	1	0
441	25406	Cedrelinga catenaeformis	452	species of Cedrelinga	y		y		y	0	1	0	1
463	40877	Pinus resinosa Ait.	466	species in the red pine group (Pinus)	y	y		y		1	0	1	0
475	40893	Robinia pseudoacacia	478	black locust (Robinia)	y	y		y		1	0	1	0
494	13400	Rhus typhina	491	sumac (Rhus)	y	y		y		1	0	1	0
512	3235	Pinus banksiana	506	species in the yellow pine group (Pinus)	y	y		y		1	0	1	0
526	17654	Hyeronima duquei	521	species of Hieronyma	y		y		y	0	1	0	1
532	15007	Cupressus arizonica	535	Libocedrus/Calocedrus	n	y		y		0	0	0	0
553	42742	Tilia americanaL.	557	basswood (Tilia)	y	y		y		1	0	1	0
573	10349	Chlorophora tinctoria	565	species of Symphonia	n		y		y	0	0	0	0
578	11224	Metopium brownel	580	species of Astronium	n		y		y	0	0	0	0
596	14377	Ulmus crassifolia	591	species in the hard elm group (Ulmus)	y	y		y		1	0	1	0
620	15763	Pinus lambertiana	618	species in the yellow pine group (Pinus), prob. Southern yellow pine	y	y		y		1	0	1	0
621	;	Cladratis lutea	631	yellowwood (Cladrastis)	y	y		y		1	0	1	0
638	10361	Terminalia amazonia	646	species of Terminalia	y		y		y	0	1	0	1
660	44246	Allanthus altissima	665	ailanthus (Ailanthus)	y	y		y		1	0	1	0
677	17662	Cedrela montana	679	Spanish-cedar (Cedrela)	y		y		y	0	1	0	1
682	26023	Podocarpus oleifolius	681	Podocarpus	y		y		y	0	1	0	1
698	6354	Ulmus rubra	708	species in the soft elm group (Ulmus)	y	y		y		1	0	1	0
727	5838	Alnus jorullensis	728	alder (Alnus)	y		y		y	0	1	0	1
742	21936	Vochysia duquei Pilger	743	species of Vochysia	y		y		y	0	1	0	1
749	15008	Juniperus deppeana	755	species of juniper (Juniperus)	y	y		y		1	0	1	0
773	16554	Cordia alliodora	770	mulberry (Morus)	n		y		y	0	0	0	0
782	527	Thuja pilleata	776	Thuja	y		y	y		0	1	1	0
792	25404	Calophyllum brasiliense	802	species of Calophyllum	y		y		y	0	1	0	1
814	23550	Quercus macrocarpa Michx.	806	species in the white oak group (Quercus)	y	y		y		1	0	1	0
827	17636	Alnus jorullensis	832	alder (Alnus)	y		y		y	0	1	0	1
835	1100	Catalpa speciosa	845	catalpa (Catalpa)	y	y		y		1	0	1	0
				number correct	42					24	18	27	15
				number wrong	11
			response rate	number inconclusive	2
			55	number blank	0
			1	% correct	0.763636
			some ID rate	% wrong	0.2
			0	% inconclusive	0.0363636
			1	% blank	0
				% correct of those attempted	0.763636

## Sheet: Consultant 3
					Y/N/I
					Genus correct?						correct			attempted				actual	reported REDACTED
			Identifcation	Notes or comments		US	Exotic	Temp	Trop	US	Exotic	Temp	Trop	US	Exotic	Temp	Trop	Hardwood or Softwood (h or s)	Hdwd / sftwd
	Quercus rubra	9	Red oak		y	y		y		1	0	1	0	27	11	31	7	Hardwood	h
	Ostrya virginiana	18		Diffuse/semi-diffuse porous with banded paranchyma, pores in earlywood are small, wood hard to section, light cream color, oil deposits on surfaces		y		y		0	0	0	0					Hardwood	h
	Jacaranda copala	35		Diffuse porous, rings not disint, parenchyma paratracheal aliform,			y		y	0	0	0	0					Hardwood	h
	Pinus sylvestris L.	51	Red Pine/Scots pine	Shallow dentate tracheids, fenstriform pitting	y		y	y		0	1	1	0					Softwood	s
	Buchenavia grandis Ducke	64		Diffuse porous, large pores, rings characterized by a single band of parenchyma, hard, dark color			y		y	0	0	0	0					Hardwood	h
	Eschewellera sessilis	82		Diffuse porous, rings not evident, weblike/banded parencyma cells, rays appear uniseriate, very dark color and hard			y		y	0	0	0	0					Hardwood	h
	Maclura pomifera	109	Black locust/osage oragne	Ring porous, pores completel occluded with tyloses, sample very small.	n	y		y		0	0	0	0					Hardwood	h
	Celtis occidentalis	129	Elm		n	y		y		0	0	0	0					Hardwood	h
	Acer saccharum	140	Hard maple		y	y		y		1	0	1	0					Hardwood	h
	Betula alleghaniensis	156	Birch		y	y		y		1	0	1	0					Hardwood	h
	Ormosia paraensis	174		Rings not evident, pores distint/winged			y		y	0	0	0	0					Hardwood	h
	Euplassa duquel	184	Tan oak		n		y		y	0	0	0	0					Hardwood	h
	Metasequoia glyptostroboides H.H.Hu & Cheng	208	Redwood		n		y	y		0	0	0	0					Softwood	s
	Morus alba	215	Black locust		n	y		y		0	0	0	0					Hardwood	h
	Prunus sargentii Rehd.	235	Soft maple		n		y	y		0	0	0	0					Hardwood	h
	Dillenia pentagyna	246	Similar to sycamore	Diffuse porous, rings not evident like sycamore, rays distinct to naked eye, darl in color, no distinct odor, hard	n		y		y	0	0	0	0					Hardwood	h
	Picea pungens	262	Spruce	Piceiod pitting, singular bordered pits, gradual transition	y	y		y		1	0	1	0					Softwood	s
	Dialium guianense	269		Diffuse porous, distinct wavy bands of parenchyma, red/brown heartwood color			y		y	0	0	0	0					Hardwood	h
	Fraxinus pennsylvanica	289	Ash	Ring porous	y	y		y		1	0	1	0					Hardwood	h
	Virola sebifera	305		Diffuse porous, rings not distint, rays barely visible with handlens, dark brown color.			y		y	0	0	0	0					Hardwood	h
	Pinus contorta	315	Hard pine	More consistent with Ponderosa	y	y		y		1	0	1	0					Softwood	s
	Malus sp.	329	Black cherry		n	y		y		0	0	0	0					Hardwood	h
	Enterolobium schomburgii	354		Diffuse porous, rings not disint, parenchyma confluent with pores, dense, brown in color, two tone color			y		y	0	0	0	0					Hardwood	h
	Robinia pseudoacacia	366	Osage orange		n	y		y		0	0	0	0					Hardwood	h
	Picea glauca	382	Spruce	Piceiod pitting, singular bordered pits, gradual transition	y	y		y		1	0	1	0					Softwood	s
	Ochroma pyramidale	404	Balsa		y		y		y	0	1	0	1					Hardwood	h
	Vochysia ferruginea	420		Diffuse porous, rings not evident, confluent parenchyma, wavy bands, brown color, rays not disctint with naked eye, 1-2 seriate			y		y	0	0	0	0					Hardwood	h
	Liriodendron tulipifera L.	437	Yellow poplar	Difuse porous, 4-6 scalariform bars, orbicular piting	y	y		y		1	0	1	0					Hardwood	h
	Cedrelinga catenaeformis	449		Diffuse porous, large pores, uniseriate rays, no distinct odor, light brown, rings evident with handlens, light weight			y		y	0	0	0	0					Hardwood	h
	Pinus resinosa Ait.	459	Red Pine/Scots pine	Dentate ray traceids/fenestrifom pitting	y	y		y		1	0	1	0					Softwood	s
	Robinia pseudoacacia	472	Catalpa		n	y		y		0	0	0	0					Hardwood	h
	Rhus typhina	488	Most consistent with Butternut	Semi-diffuse, not hard, dark brown color, no distint odor	n	y		y		0	0	0	0					Hardwood	h
	Pinus banksiana	511	Pine (hard pine)	More consistent with southern yellow	y	y		y		1	0	1	0					Softwood	s
	Hyeronima duquei	529		Sample has steep slope of grain, difficult to get good section			y		y	0	0	0	0					Hardwood	h
	Cupressus arizonica	539	Red cedar		n	y		y		0	0	0	0					Softwood	s
	Tilia americanaL.	558	Basswood		y	y		y		1	0	1	0					Hardwood	h
	Chlorophora tinctoria	562		Rings not evident, wavy bands, tyloses, hard, difficult to section, dark brown/red color, similar to osage orange/black locust			y		y	0	0	0	0					Hardwood	h
	Metopium brownel	586		Diffuse porous, rings not distinct, uniseriate rays, pores with tyloses, dark brown, hard			y		y	0	0	0	0					Hardwood	h
	Ulmus crassifolia	595	Elm	Most consistent with Winged elm	y	y		y		1	0	1	0					Hardwood	h
	Pinus lambertiana	613	White pine		y	y		y		1	0	1	0					Softwood	s
	Cladratis lutea	630	Most consistent with Ash	Ring porous, latewood pores not in distinct lines, no tyloses, green color, no distinct odor	n	y		y		0	0	0	0					Hardwood	h
	Terminalia amazonia	641		Diffuse porous, rings not distict, pores solitary sometimes in groups of 2, rays uniseriate, light brown, hard			y		y	0	0	0	0					Hardwood	h
	Allanthus altissima	661	True hickory		n	y		y		0	0	0	0					Hardwood	h
	Cedrela montana	669		Diffuse porous, distinct ring boundaries, distict odor, brown/red color, light weight			y		y	0	0	0	0					Hardwood	h
	Podocarpus oleifolius	686	Atlantic white cedar		n		y		y	0	0	0	0					Softwood	s
	Ulmus rubra	697	Slippery Elm		y	y		y		1	0	1	0					Hardwood	h
	Alnus jorullensis	713	Tupelo		n		y		y	0	0	0	0					Hardwood	h
	Vochysia duquei Pilger	740		Diffuse porous, rings not distinct, deposits in pores			y		y	0	0	0	0					Hardwood	h
	Juniperus deppeana	752	Incense cedar		n	y		y		0	0	0	0					Softwood	s
	Cordia alliodora	759	Black walnut	Appears to be slightly more consistent with butternut. Sample is light wiehgt and easy to section	n		y		y	0	0	0	0					Hardwood	h
	Thuja pilleata	778	Western red cedar		y		y	y		0	1	1	0					Softwood	s
	Calophyllum brasiliense	800		Diffuse porous, rings not evident, banded parenchyma, brown/orange color, difficult to section			y		y	0	0	0	0					Hardwood	h
	Quercus macrocarpa Michx.	808	White oak		y	y		y		1	0	1	0					Hardwood	h
	Alnus jorullensis	820	Buckeye or Populus spp.		n		y		y	0	0	0	0					Hardwood	h
	Catalpa speciosa	839	Hackberry/elm or similar species	Similar to hackberry and elm. Almost diffuse porous with wavy bands of small latewood pores in the latewood	n	y		y		0	0	0	0					Hardwood	h
				number correct	18					15	3	17	1
				number wrong	20													100% correct
			response rate	number inconclusive	0					0.555556	0.272727	0.548387	0.142857
			33	number blank	17
			0.6	% correct	0.327273
			some ID rate	% wrong	0.363636
			0	% inconclusive	0
			1	% blank	0.309091
				% correct of those attempted	0.473684
